# Supplementary material for: Analysis of biogas production from sewage sludge combining BMP experimental assays and the ADM1 model
Source: PeerJ. 2024 Jan 15;12:e16720. doi: 10.7717/peerj.16720 (PMC10795531; doi:10.7717/peerj.16720)
Supplement: Supplemental Information 1 [file peerj-12-16720-s001.xlsx]

## Sheet: CH4 N mL
CH4 NmL cumulative production
Days	R1	R2	R3	R4	R5	R6	Mean	sd
0	0	0	0	0	0	0	0	0
1	50	50	50	50	55	55	51.6667	2.58199
2	70	70	80	80	85	85	78.3333	6.8313
3	85	90	105	95	105	98	96.3333	8.04156
4	95	102	117	105	119	112	108.333	9.28799
5	105	112	128	111	128	118	117	9.46573
6	115	123	137	119	136	126	126	8.94427
7	123	135	137	127	140	130	132	6.44981
8	124	143	137	135	140	130	134.833	6.91134
9	124	143	137	142	140	130	136	7.50999
10	124	143	137	142	140	130	136	7.50999
11	124	143	137	142	140	130	136	7.50999

## Sheet: CH4 gVS 
Methane yield mL CH4 g-1 VS-1
Days	Reactor 1	Reactor 2	Reactor 3	Reactor 4	Reactor 5	Reactor 6	Mean	sd
0	0	0	0	0	0	0	0	0
1	45.4545	45.4545	45.4545	45.4545	50	50	46.9697	2.14275
2	63.6364	63.6364	72.7273	72.7273	77.2727	77.2727	71.2121	5.66918
3	77.2727	81.8182	95.4545	86.3636	95.4545	89.0909	87.5758	6.67355
4	89.0909	92.7273	106.364	95.4545	108.182	101.818	98.9394	7.03037
5	98.1818	101.818	116.364	100.909	116.364	107.273	106.818	6.72885
6	105.455	111.818	124.545	108.182	123.636	114.545	114.697	7.22363
7	111.818	122.727	124.545	115.455	127.273	118.182	120	4.95553
8	112.727	130	124.545	122.727	127.273	118.182	122.576	5.31014
9	112.727	130	124.545	129.091	127.273	118.182	123.636	6.23241
10	112.727	130	124.545	129.091	127.273	118.182	123.636	6.23241
11	112.727	130	124.545	129.091	127.273	118.182	123.636	6.23241

## Sheet: physc-chem
parameter	unity	Reactor 1	Reactor 2	Reactor 3	Reactor 4	Reactor 5	Reactor 6	Mean	SD
PH initial	-	7.46	7.45	7.43	7.42	7.43	7.44	7.43833	0.0147196
PH final	-	7.5	7.65	7.61	7.6	7.58	7.75	7.605	0.0566667
temperature	°C	37.1	37.2	37.1	37	37	37.15	37.0917	0.0801041
tCODfinal	mg L-1	16820	15680	16714	16316	16512	16970	16502	288
COD removal	%	23.2	28.4	23.7	25.5	24.7	23.5	24.8333	1.41111

## Sheet: chemic
parameter	unity	Value 1	Value 2	Value 3	Mean	SD
Alkalinity	mg CaCO3 L-1	2283	2381	2483	2382.33	100.007
tCOD initial	mg L-1	22903	21905	20903	21903.7	1000
TOC	mg L-1	803	881	1002	895.333	100.271

## Sheet: solids
parameter	abreviation	unity	value1	value2	value3	mean	sd
total solids	TS	ppm mg L-1	20345	20444	20585	20458	120.611
total solids	TS	%	2	2	2	2	0
total volatile solids	TVS	ppm mg L-1	11132	11165	11453	11250	176.576
total volatile solids	TVS	%	1.1	1.1	1.1	1.1	0
volatile suspended solids	VSS	ppm mg L-1	8011	8050	8073	8044.67	31.3422
volatile suspended solids	VSS	%	0.8	0.8	0.8	0.8	1.35974e-16

## Sheet: ADM1
ADM1 model detailed input data for SWS feedstock composition, based on the initial real SWS COD
Sludge composition	Model variables
(Kg COD m-3)
x01 =1.5031e-02	Amino Acid
x02 =6.7129e-03	Monosaccharide
x03 = 1.2853e-01	LCFA
x04 = 1.4532e-02	Total Valerate
x05 =1.6795e-02	Total Butyrate
x06 =2.0244e-02	Total Propionate
x07 =4.2027e-02	Total Acetate
x08 =0.00	Hydrogen Gas
x09 =0.00	Methane Gas
x010 =6.3799e-01	Inorganic Carbon
x011 =1.2453e-01	Inorganic Nitrogen
x012 =3.7066e+00	Inert Soluble
x013 =5.0183e+00	Complex Composite
x014 =4.9515e-02	Carbohydrate
x015 =1.5778e-01	Proteins
x016 =7.7605e-02	Lipids
x017 =6.0868e-01	Sugar Consumers
x018 =1.4414e+00	Amino Acid Consumers
x019 =4.9932e-01	LCFA Consumers
x020 =5.2954e-01	Valerate/Butyrate Consumers
x021 =1.6868e-01	Propionate Consumers
x022 =1.0750e+00	Consumers of Acetate
x023 =4.5639e-01	Hydrogen Consumers
x024 = 7.5005e+00	Inert Particulate

## Sheet:  ADM1 m
Comparison between CH4 production obtained experimentally by the BMP assays and estimated by the ADM1 computational modelling mL CH4 g-1 VS-1
Day	CH4	CH4	Error (%)
	BMP assay	ADM1 model
0	0	0	0
1	469697	464013	-12101
2	712121	728888	23545
3	875758	895668	22735
4	984848	1003918	19363
5	1063636	1076856	12429
6	1145455	1128359	-14925
7	1200000	1166777	-27685
8	1225758	1197153	-23336
9	1236364	1222534	-11186
10	1236364	1244768	0.6797
11	1236364	1264973	23140
